# Supplementary material for: Randomized Clinical Trial: Effects of β-Hydroxy-β-Methylbutyrate (HMB)-Enriched vs. HMB-Free Oral Nutritional Supplementation in Malnourished Cirrhotic Patients
Source: MDPI journal article supplement (doi:10.3390/nu14112344), 2022-06-03
Supplement: s1 [file s1]

## Supplementary Material

**Table S1. Nutritional composition of each oral supplement**

|                   | Ensure® Plus Advance<br>(per bottle) | Ensure® Plus High Protein<br>(per bottle) |
|-------------------|--------------------------------------|-------------------------------------------|
| Energy (Kcal)     | 330                                  | 275                                       |
| Proteins (g)      | 20                                   | 17.4                                      |
| Carbohydrates (g) | 37                                   | 35                                        |
| Fats (g)          | 11                                   | 7.3                                       |
| Water (g)         | 168                                  | 177                                       |
| Vitamin D3 (mcg)  | 13                                   | 2.4                                       |
| Leucine (g)       | 1.78                                 | 1.54                                      |
| Isoleucine (g)    | 0.99                                 | 0.814                                     |
| Valine (g)        | 1.14                                 | 1.012                                     |

**Table S2. Anthropometric characteristics at baseline**

|                           | HMB Group (n=22)  |             |                  | HP Group (n=21)  |             |                  | p     |
|---------------------------|-------------------|-------------|------------------|------------------|-------------|------------------|-------|
|                           | Total             | Men         | Women            | Total            | Men         | Women            |       |
| BMI (Kg/m <sup>2</sup> )  | 25.6 ± 4.31       | 26.4 ± 4.34 | 24.2 ± 4.18      | 26.2 ± 3.94      | 26.3 ± 4.56 | 26.1 ± 2.94      | 0.625 |
| %FM                       | 18.4 [6.15-25.6]  | 16.3 ± 9.91 | 19.6 ± 11.5      | 18.8 [8.4-26.1]  | 14.4 ± 8.47 | 22.4 ± 9.19      | 0.923 |
| FFMI (Kg/m <sup>2</sup> ) | 20.8 ± 2.3        | 21.7 ± 1.78 | 19.2 ± 2.32      | 21.4 ± 2.76      | 22.2 ± 2.76 | 20.2 ± 2.39      | 0.403 |
| SMI (Kg/m <sup>2</sup> )  | 10.8 [9.15- 11.8] | 11.5 ± 1.53 | 8.55 [7.78-9.57] | 10.0 [9.1-11.7]  | 11.5 ± 1.96 | 8.65 [7.95-9.55] | 0.644 |
| ASMM (Kg)                 | 24.4 [19.3-28.2]  | 26.4 ± 3.23 | 17.1 [15.8-19.5] | 22.2 [19.2-27.2] | 25.4 ± 5.38 | 19.3 [17.2-22.4] | 0.715 |
| Biceps skinfold (mm)      | 6 [4.5-10]        | 6.09 ± 2.63 | 9.12 ± 6.29      | 8 [6-10]         | 7.88 ± 4.09 | 10.0 ± 4.38      | 0.211 |
| Triceps skinfold (mm)     | 12.9 ± 6.38       | 10.9 ± 4.27 | 16 ± 8.18        | 14.4 ± 6.8       | 12 ± 6.78   | 18.2 ± 5.13      | 0.468 |
| MUAC (cm)                 | 26 ± 4.76         | 27.1 ± 4.64 | 24.2 ± 4.66      | 27.7 ± 3.88      | 27.7 ± 4.43 | 27.8 ± 3.06      | 0.207 |
| MAMC (cm)                 | 22.2 ± 4.19       | 23.9 ± 3.89 | 19.2 ± 2.84      | 23.2 ± 3.51      | 24.0 ± 3.89 | 22.0 ± 2.58      | 0.381 |
| Calf circumference (cm)   | 35 ± 4.57         | 36.4 ± 3.21 | 32.6 ± 5.75      | 36.2 ± 4.14      | 36.8 ± 4.75 | 35.1 ± 2.86      | 0.385 |
| Hand grip (Kg)            | 28.9 ± 7.48       | 33.1 ± 5.9  | 21.5 ± 2.39      | 31.7 ± 7.93      | 35.5 ± 6.5  | 25.5 ± 6.07      | 0.240 |

BMI: body mass index, %FM: percentage of fat mass, FFMI: fat-free mass index, SMI: skeletal muscle mass index, ASMM: appendicular skeletal muscle mass, MUAC: mid-upper arm circumference, MAMC: mid-arm muscle-circumference. P: p-value for the comparison between total HMB vs. HP groups.

# Supplementary Material

**Table S3.** Laboratory tests at baseline

|                                  | HMB Group (n=22)    | HP Group (n=21)     | p     |
|----------------------------------|---------------------|---------------------|-------|
| <b>Ferritin (ng/ml)</b>          | 156.0 [60.9-523.0]  | 97.2 [72.4-662]     | 0.662 |
| <b>Transferrin (mg/dl)</b>       | 218.0 ± 56.6        | 217.0 ± 74.1        | 0.960 |
| <b>Vitamin B12 (pg/ml)</b>       | 488.0 [252-778]     | 599.0 [389,0-756.0] | 0.161 |
| <b>CRP (mg/dl)</b>               | 0.38 [0.15-0.68]    | 0.66 [0.16-1.55]    | 0.512 |
| <b>Urea (mg/dl)</b>              | 29.0 [24.5-42.5]    | 28.0 [25.0-34.0]    | 0.670 |
| <b>Creatinine (mg/dl)</b>        | 0.73 [0.58-0.91]    | 0.69 [0.61-0.81]    | 0.874 |
| <b>Triglycerides (mg/dl)</b>     | 68.0 [51.2-93.2]    | 68.0 [54.0-106.0]   | 0.496 |
| <b>Total cholesterol (mg/dl)</b> | 172.0 ± 58.9        | 177.0 ± 50.9        | 0.748 |
| <b>HDL-cholesterol (mg/dl)</b>   | 50.9 ± 19.6         | 54.6 ± 16.9         | 0.509 |
| <b>LDL-cholesterol (mg/dl)</b>   | 106.0 ± 44.6        | 106.0 ± 41.3        | 0.949 |
| <b>APO A1 (mg/dl)</b>            | 138.0 ± 43.5        | 143.0 ± 37.3        | 0.694 |
| <b>APO B (mg/dl)</b>             | 72.3 [51.3-112]     | 70.3 [63.8-86.1]    | 0.961 |
| <b>Lipoprotein (a) (mg/dl)</b>   | 9.75 [3.21-19.9]    | 3.53 [2.07-9.72]    | 0.155 |
| <b>Bilirubin (mg/dl)</b>         | 1.69 [1.05-2.46]    | 1.75 [1.31-2.57]    | 0.662 |
| <b>Plasma proteins (g/dl)</b>    | 7.20 [6.82-7.40]    | 7.20 [6.60-7.40]    | 0.644 |
| <b>Albumin (g/dl)</b>            | 3.58 ± 0.57         | 3.56 ± 0.62         | 0.913 |
| <b>Prealbumin (mg/dl)</b>        | 11.6 [6.38-15.2]    | 9.18 [7.62-12.8]    | 0.846 |
| <b>ALP (U/L)</b>                 | 104.0 [93.8-140.0]  | 131.0 [112.0-158.0] | 0.138 |
| <b>GGT (U/L)</b>                 | 64.5 [40.2-100.0]   | 98.0 [61.0-126.0]   | 0.194 |
| <b>AST (U/L)</b>                 | 40.5 [30.8-56.5]    | 43.0 [32.0-88.0]    | 0.248 |
| <b>ALT (U/L)</b>                 | 23.0 [15.0-28.5]    | 30.0 [21.0-41.0]    | 0.018 |
| <b>Ammonia (μM)</b>              | 56.0 [40.0-83.0]    | 55.0 [40.0-76.0]    | 0.923 |
| <b>Vitamin D (nmol/L)</b>        | 17.5 [10.8-38.2]    | 34.1 [16.3-42.6]    | 0.195 |
| <b>BAP (U/L)</b>                 | 24 [19.5-29.9]      | 26.8 [23.6-29.1]    | 0.325 |
| <b>Osteocalcin (ng/ml)</b>       | 7.3 [6.15-11.9]     | 7.0 [5.6-9.5]       | 0.415 |
| <b>PICP (μg/l)</b>               | 123.0 [97.7-175.0]  | 118.0 [88.4-145.0]  | 0.529 |
| <b>CTX (pg/ml)</b>               | 443.0 [285.0-603.0] | 289.0 [250.0-424.0] | 0.033 |
| <b>HMB (μmol/l)</b>              | 3.26 [1.54-4.47]    | 1.5 [1.19-3.17]     | 0.099 |

CRP: C-Reactive Protein, HDL: High-Density Lipoprotein, LDL: Low-Density Lipoprotein, APO A1: Apolipoprotein A1, APO B: Apolipoprotein B, ALP: Alkaline Phosphatase, GGT: Gamma-GlutamylTransferase, AST: Aspartate Transaminase, ALT: Alanine Transaminase, BAP: Bone Alkaline Phosphatase, PICP: Procollagen type I Carboxy-terminal Propeptide, CTX: C-Terminal telopeptide, HMB: β-Hydroxy-β-MethylButyrate

**Table S4.** Differences in clinical and body composition characteristics between compliers and dropouts

|                                 | Compliers (n=34) | Dropouts (n=9)   | p     |
|---------------------------------|------------------|------------------|-------|
| <b>Age (Years)</b>              | 61.1 (9.09)      | 60.1 (8.31)      | 0.756 |
| <b>Men (n%)</b>                 | 13 (38.2%)       | 3 (33.3%)        | 1.000 |
| <b>Cirrhosis Etiology n (%)</b> |                  |                  |       |
| <b>Alcohol</b>                  | 21 (61.8%)       | 7 (77.8%)        | 0.624 |
| <b>HCV</b>                      | 4 (11.8%)        | 1 (11.1%)        |       |
| <b>Autoimmune</b>               | 3 (8.82%)        | 1 (11.1%)        |       |
| <b>NAFLD</b>                    | 3 (8.82%)        | 0 (0.00%)        |       |
| <b>HBV+NAFLD</b>                | 1 (2.94%)        | 0 (0.00%)        |       |
| <b>PBC</b>                      | 1 (2.94%)        | 0 (0.00%)        |       |
| <b>Hemochromatosis</b>          | 3 (8.82%)        | 1 (11.1%)        |       |
| <b>Ascites</b>                  | 18 (52.9%)       | 3 (33.3%)        | 0.457 |
| <b>Child-Pugh</b>               | 7.00 [6.00;8.75] | 6.00 [6.00;8.00] | 0.581 |
| <b>MELD</b>                     | 11.5 [9.25;15.8] | 15.0 [7.00;18.0] | 0.787 |
| <b>SGA</b>                      | 9.75 [3.21-19.9] | 3.53 [2.07-9.72] | 0.155 |
| <b>Class B</b>                  | 1.69 [1.05-2.46] | 1.75 [1.31-2.57] | 0.662 |
| <b>Class C</b>                  | 7.20 [6.82-7.40] | 7.20 [6.60-7.40] | 0.644 |
| <b>BMI</b>                      | 25.7 (4.32)      | 26.5 (3.24)      | 0.557 |
| <b>FMI</b>                      | 5.20 [1.03;7.27] | 4.60 [3.30;6.40] | 0.846 |
| <b>FFMI</b>                     | 21.0 (2.51)      | 21.5 (2.70)      | 0.589 |

Data are number (%), median [IQR], or mean  $\pm$ SD. p: p-value for the difference. HCV: Hepatitis C Virus, NAFLD: Non-Alcoholic Fatty Liver Disease, HBV: Hepatitis B Virus, PBC: Primary Biliary Cholangitis, MELD: Model for End Stage Liver Disease, SGA: Subjective Global Assessment, BMI: body mass index, FMI: fat mass index, FFMI: fat-free mass index
